# Supplementary material for: Early-Life Bisphenol A Exposure and Child Body Mass Index: A Prospective Cohort Study
Source: PubMed Central journal article supplement (PMC4216170; doi:10.1289/ehp.1408258), 2014-07-29
Supplement: ehp.1408258.s001.508.pdf [file ehp.1408258.s001.508.pdf]

## Supplemental Material

### **Early-Life Bisphenol A Exposure and Child Body Mass Index: A Prospective Cohort Study**

Joseph M. Braun, Bruce P. Lanphear, Antonia M. Calafat, Sirad Deria, Jane Khoury, Chanelle J. Howe, and Scott A. Venners

| <b>Table of Contents</b>                                                                                                                                                                  | <b>Page</b> |
|-------------------------------------------------------------------------------------------------------------------------------------------------------------------------------------------|-------------|
| <b>Table S1.</b> Timing of urine sample collection in pregnant women and their children from Cincinnati, OH (2003-2012)                                                                   | 2           |
| <b>Table S2.</b> Urinary BPA concentrations during pregnancy (2003-2006) and the 1 <sup>st</sup> 5 years of life (2004-2012) among Cincinnati, OH women and their children                | 3           |
| <b>Table S3.</b> Pearson correlation coefficients between log <sub>10</sub> -transformed urinary BPA concentrations in Cincinnati, OH women and their children                            | 4           |
| <b>Table S4.</b> Unadjusted and adjusted change in child BMI z-score between 2-5 years of age with a 10-fold increase in maternal or early childhood urinary BPA concentrations           | 5           |
| <b>Table S5.</b> Sensitivity analyses examining robustness of results to various exclusions and analytic assumptions                                                                      | 6           |
| <b>Table S6.</b> Adjusted change in child waist circumference between 4-5 years of age by tercile of or with a 10-fold increase in maternal or early childhood urinary BPA concentrations | 7           |
| <b>Table S7.</b> Adjusted change in child BMI z-score between 2-5 years of age with a 10-fold increase in maternal or early childhood urinary BPA concentrations-stratified by child sex  | 8           |
| <b>Table S8.</b> Adjusted cross-sectional associations between child urinary BPA concentrations and BMI z-scores at 2-5 years of age                                                      | 9           |
| <b>Figure S1.</b> Distribution of HOME Study children's BMI z-scores at 2, 3, 4, and 5 years of age                                                                                       | 10          |
| <b>Figure S2.</b> Adjusted BMI z-score slopes between 2 and 5 years of age by prenatal urinary BPA concentration and child sex                                                            | 11          |
| <b>Figure S3.</b> Adjusted BMI z-score slopes between 2 and 5 years of age by early childhood urinary BPA concentration and child sex                                                     | 13          |

**Table S1.** Timing of urine sample collection in pregnant women and their children from Cincinnati, OH (2003-2012).

| <b>Measurement</b> | <b>N</b> | <b>Mean</b> | <b>SD</b> | <b>Min</b> | <b>Max</b> |
|--------------------|----------|-------------|-----------|------------|------------|
| 16 Week            | 296      | 16.0        | 1.9       | 11.3       | 22.6       |
| 26 Week            | 290      | 26.5        | 2.0       | 21.6       | 34.6       |
| 1 Year             | 249      | 1.08        | 0.09      | 0.94       | 1.61       |
| 2 Year             | 231      | 2.09        | 0.08      | 1.84       | 2.38       |
| 3 Year             | 231      | 3.10        | 0.12      | 2.88       | 3.62       |
| 4 Year             | 168      | 4.13        | 0.13      | 3.77       | 4.65       |
| 5 Year             | 199      | 5.20        | 0.24      | 4.75       | 6.00       |

16 and 26 week values are units of gestational week. 1-5 year values are in units of years.

**Table S2.** Urinary BPA concentrations during pregnancy (2003-2006) and the 1<sup>st</sup> 5 years of life (2004-2012) among Cincinnati, OH women and their children.

| <b>Creatinine adjustment and time of urine measurement</b> | <b>N</b> | <b>p5</b> | <b>p25</b> | <b>p50</b> | <b>p75</b> | <b>p95</b> |
|------------------------------------------------------------|----------|-----------|------------|------------|------------|------------|
| <b>Non-standardized (mg/L)</b>                             |          |           |            |            |            |            |
| Average prenatal                                           | 297      | 0.4       | 1.1        | 2.1        | 3.9        | 11.4       |
| 16 Week                                                    | 297      | 0.3       | 0.9        | 2.0        | 3.3        | 11.4       |
| 26 Week                                                    | 290      | 0.3       | 0.8        | 1.8        | 3.3        | 10.4       |
| Average 1+2 year                                           | 287      | 0.8       | 1.8        | 3.6        | 6.9        | 16.1       |
| 1 Year                                                     | 251      | 0.5       | 1.7        | 3.8        | 7.3        | 21.6       |
| 2 Year                                                     | 233      | 0.6       | 1.5        | 2.9        | 7.4        | 24.3       |
| 3 Year                                                     | 233      | 0.5       | 1.4        | 2.9        | 5.1        | 16.4       |
| 4 Year                                                     | 170      | 0.3       | 1.1        | 2.0        | 4.1        | 14.4       |
| 5 Year                                                     | 201      | 0.5       | 1.1        | 2.3        | 3.7        | 11.7       |
| <b>Creatinine standardized (mg/g creatinine)</b>           |          |           |            |            |            |            |
| Average prenatal                                           | 297      | 0.9       | 1.5        | 2.1        | 3.5        | 8.8        |
| 16 Week                                                    | 296      | 0.6       | 1.1        | 1.8        | 3.0        | 10.7       |
| 26 Week                                                    | 290      | 0.8       | 1.4        | 2.0        | 3.3        | 8.1        |
| Average 1+2 year                                           | 285      | 4.7       | 8.4        | 13.7       | 23.6       | 54.5       |
| 1 Year                                                     | 249      | 5.1       | 10.0       | 17.9       | 32.5       | 72.7       |
| 2 Year                                                     | 231      | 3.3       | 5.9        | 10.5       | 18.3       | 65.0       |
| 3 Year                                                     | 231      | 1.5       | 3.1        | 5.3        | 9.4        | 23.2       |
| 4 Year                                                     | 168      | 1.2       | 2.3        | 3.7        | 6.1        | 15.4       |
| 5 Year                                                     | 199      | 1.2       | 1.9        | 3.1        | 5.3        | 16.2       |

Number of mothers/children for the average concentrations is greater than the individual concentrations since not all the same participants returned at the both visits.

**Table S3.** Pearson correlation coefficients between  $\log_{10}$ -transformed urinary BPA concentrations in Cincinnati, OH women and their children.

| <b>Creatinine adjustment and BPA exposure measure</b> | <b>Maternal: average</b> | <b>Maternal: 16 week</b> | <b>Maternal: 26 week</b> | <b>Child: average</b> | <b>Child: 1 year</b> | <b>Child: 2 year</b> |
|-------------------------------------------------------|--------------------------|--------------------------|--------------------------|-----------------------|----------------------|----------------------|
| <b>No creatinine-normalization</b>                    |                          |                          |                          |                       |                      |                      |
| Maternal: average                                     | 1.00                     | 0.81*                    | 0.81*                    | 0.17*                 | 0.12                 | 0.19*                |
| Maternal: 16 week                                     |                          | 1.00                     | 0.30*                    | 0.12*                 | 0.04                 | 0.15*                |
| Maternal: 26 week                                     |                          |                          | 1.00                     | 0.15*                 | 0.15*                | 0.17*                |
| Child: average                                        |                          |                          |                          | 1.00                  | 0.81*                | 0.83*                |
| Child: 1 year                                         |                          |                          |                          |                       | 1.00                 | 0.19*                |
| Child: 2 year                                         |                          |                          |                          |                       |                      | 1.00                 |
| <b>Creatinine-normalized</b>                          |                          |                          |                          |                       |                      |                      |
| Maternal: average                                     | 1.00                     | 0.77*                    | 0.72*                    | 0.03                  | 0.10                 | -0.05                |
| Maternal: 16 week                                     |                          | 1.00                     | 0.09                     | 0.03                  | 0.01                 | 0.01                 |
| Maternal: 26 week                                     |                          |                          | 1.00                     | 0.01                  | 0.14*                | -0.07                |
| Child: average                                        |                          |                          |                          | 1.00                  | 0.78*                | 0.80*                |
| Child: 1 year                                         |                          |                          |                          |                       | 1.00                 | 0.10                 |
| Child: 2 year                                         |                          |                          |                          |                       |                      | 1.00                 |

\*Indicates that Pearson correlation is statistically significant ( $p < 0.05$ ).

**Table S4.** Unadjusted and adjusted change in child BMI z-score between 2-5 years of age with a 10-fold increase in maternal or early childhood urinary BPA concentrations.

| Adjustments                                                                                                   | Prenatal beta (CI) | Prenatal p-value | Early childhood beta (CI) | Early childhood p-value |
|---------------------------------------------------------------------------------------------------------------|--------------------|------------------|---------------------------|-------------------------|
| Unadjusted                                                                                                    | -0.2 (-0.7, 0.2)   | 0.24             | -0.1 (-0.5, 0.2)          | 0.42                    |
| SES + Perinatal variables <sup>a</sup>                                                                        | -0.1 (-0.5, 0.3)   | 0.51             | -0.2 (-0.6, 0.1)          | 0.19                    |
| SES + Perinatal + Maternal Nutrition <sup>b</sup>                                                             | -0.1 (-0.5, 0.3)   | 0.48             | -0.2 (-0.5, 0.1)          | 0.24                    |
| SES + Perinatal + Child Nutrition <sup>c</sup>                                                                | -0.1 (-0.5, 0.3)   | 0.57             | -0.2 (-0.6, 0.1)          | 0.20                    |
| SES + Perinatal + Child Activity <sup>d</sup>                                                                 | -0.1 (-0.5, 0.3)   | 0.54             | -0.2 (-0.6, 0.1)          | 0.19                    |
| SES + Perinatal + Child Activity + Maternal and Child Nutrition                                               | -0.1 (-0.5, 0.3)   | 0.54             | -0.2 (-0.5, 0.1)          | 0.24                    |
| SES + Perinatal + Child Activity + Maternal and Child Nutrition + Pre- and Postnatal BPA                      | -0.2 (-0.6, 0.3)   | 0.45             | -0.2 (-0.5, 0.1)          | 0.24                    |
| SES + Perinatal + Child Activity + Maternal and Child Nutrition + Pre- or Postnatal urinary DEHP <sup>e</sup> | -0.1 (-0.5, 0.3)   | 0.58             | -0.2 (-0.6, 0.1)          | 0.23                    |
| SES + Perinatal + Child Activity + Maternal and Child Nutrition + Child Age <sup>f</sup>                      | -0.1 (-0.5, 0.3)   | 0.48             | -0.2 (-0.6, 0.1)          | 0.20                    |
| Adjusted for postnatal cotinine                                                                               | -0.1 (-0.6, 0.3)   | 0.49             | -0.2 (-0.6, 0.1)          | 0.25                    |

<sup>a</sup>Maternal race (white, black, and other), marital status (married living together, unmarried living together, and unmarried living alone), parity (0, 1, and 2+), age at delivery (continuous in years), household income (continuous in \$10,000 increments), education (< high school, high school, some college, and  $\geq$  bachelor's degree), employment (any and none), insurance (private and public/none), BMI at 16 weeks (continuous in  $\text{kg}/\text{m}^2$ ), depressive symptoms at baseline (continuous), and prenatal serum cotinine (continuous,  $\log_{10}$ -transformed). <sup>b</sup>Prenatal vitamin intake (weekly/daily and rarely/never), prenatal canned vegetable consumption ( $\geq$  daily, weekly, and  $\leq$  monthly), and prenatal fresh fruit/vegetable intake (monthly/weekly vs.  $\geq$  daily). <sup>c</sup>Child canned vegetable consumption ( $\geq$  daily, weekly, and  $\leq$  monthly), child fresh fruit/vegetable intake (monthly/weekly vs.  $\geq$  daily), and duration of any breastfeeding (weeks). <sup>d</sup>Number of hours child watches television or DVD/videos (continuous in hours) and number of hours child plays outside (continuous in hours). <sup>e</sup>Prenatal models adjusted for average maternal urinary di-2-ethylhexyl phthalate (DEHP) levels during pregnancy. Postnatal models adjusted for average child urinary DEHP levels during the first two years of life. <sup>f</sup>Child age in months at time of BMI measurement.

**Table S5.** Sensitivity analyses examining robustness of results to various exclusions and analytic assumptions.

| <b>Adjustments</b>                                    | <b>Prenatal beta (CI)</b> | <b>Prenatal p-value</b> | <b>Early childhood beta (CI)</b> | <b>Early childhood p-value</b> |
|-------------------------------------------------------|---------------------------|-------------------------|----------------------------------|--------------------------------|
| Unadjusted                                            | -0.2 (-0.7, 0.2)          | 0.24                    | -0.1 (-0.5, 0.2)                 | 0.42                           |
| Adjusted <sup>a</sup>                                 | -0.1 (-0.5, 0.3)          | 0.51                    | -0.2 (-0.6, 0.1)                 | 0.19                           |
| Adjusted-No SGA <sup>a,b</sup>                        | -0.3 (-0.6, 0.1)          | 0.22                    | -0.1 (-0.4, 0.2)                 | 0.51                           |
| Adjusted-No GDM <sup>a,b</sup>                        | -0.1 (-0.5, 0.3)          | 0.64                    | -0.2 (-0.6, 0.1)                 | 0.15                           |
| Adjusted-No PIH <sup>a,b</sup>                        | -0.2 (-0.6, 0.3)          | 0.47                    | -0.3 (-0.7, 0.1)                 | 0.10                           |
| Adjusted-exclude high prenatal BPA value <sup>a</sup> | -0.1 (-0.5, 0.4)          | 0.76                    | -0.2 (-0.6, 0.1)                 | 0.17                           |
| Adjusted-No creatinine normalization <sup>a</sup>     | -0.1 (-0.6, 0.3)          | 0.49                    | -0.2 (-0.6, 0.1)                 | 0.25                           |

<sup>a</sup>Maternal race (white, black, and other), marital status (married living together, unmarried living together, and unmarried living alone), parity (0, 1, and 2+), age at delivery (continuous in years), household income (continuous in \$10,000 increments), education (< high school, high school, some college, and  $\geq$  bachelor's degree), employment (any and none), insurance (private and public/none), BMI at 16 weeks (continuous in  $\text{kg}/\text{m}^2$ ), depressive symptoms at baseline (continuous), and prenatal serum cotinine (continuous,  $\log_{10}$ -transformed). <sup>b</sup>Small for gestational age (SGA, n = 24), gestational diabetes mellitus (GDM, n = 13), and pregnancy induced hypertension (PIH, n = 29).

Beta represents change in child BMI z-score with a 10-fold increase in child urinary BPA concentrations.

**Table S6.** Adjusted change in child waist circumference between 4-5 years of age by tercile of or with a 10-fold increase in maternal or early childhood urinary BPA concentrations.<sup>a</sup>

| <b>BPA exposure measure</b>                | <b>N</b> | <b>Mean waist circumference (cm)</b> | <b>Beta (CI)</b> | <b>p-value</b> |
|--------------------------------------------|----------|--------------------------------------|------------------|----------------|
| <b>Prenatal</b>                            |          |                                      |                  |                |
| 1 <sup>st</sup> Tercile (0.4-1.6 mg/g Cr)  | 70       | 52.5                                 | Ref              |                |
| 2 <sup>nd</sup> Tercile (1.6-2.6 mg/g Cr)  | 71       | 51.9                                 | -0.5 (-2.0, 0.9) | 0.45           |
| 3 <sup>rd</sup> Tercile (2.7-49 mg/g Cr)   | 70       | 52.0                                 | -0.5 (-2.3, 1.3) | 0.60           |
| Continuous, log <sub>10</sub> -transformed | 211      |                                      | -1.5 (-4.0, 1.0) | 0.24           |
| <b>Early childhood</b>                     |          |                                      |                  |                |
| 1 <sup>st</sup> Tercile (3.2-11 mg/g Cr)   | 67       | 52.5                                 | Ref              |                |
| 2 <sup>nd</sup> Tercile (11-20 mg/g Cr)    | 68       | 52.4                                 | -0.1 (-1.5, 1.3) | 0.94           |
| 3 <sup>rd</sup> Tercile (20-233 mg/g Cr)   | 67       | 51.5                                 | -1.0 (-2.5, 0.6) | 0.22           |
| Continuous, log <sub>10</sub> -transformed | 202      |                                      | -1.2 (-3.4, 1.0) | 0.28           |

<sup>a</sup>Maternal race (white, black, and other), marital status (married living together, unmarried living together, and unmarried living alone), parity (0, 1, and 2+), age at delivery (continuous in years), household income (continuous in \$10,000 increments), education (< high school, high school, some college, and ≥ bachelor's degree), employment (any and none), insurance (private and public/none), BMI at 16 weeks (continuous in kg/m<sup>2</sup>), depressive symptoms at baseline (continuous), and prenatal serum cotinine (continuous, log<sub>10</sub>-transformed).

**Table S7.** Adjusted change in child BMI z-score between 2-5 years of age with a 10-fold increase in maternal or early childhood urinary BPA concentrations-stratified by child sex.<sup>a</sup>

| <b>Creatinine adjustment and child sex strata</b> | <b>Prenatal beta (CI)</b> | <b>Prenatal p-value</b> | <b>Early childhood beta (CI)</b> | <b>Early childhood p-value</b> |
|---------------------------------------------------|---------------------------|-------------------------|----------------------------------|--------------------------------|
| <b>Creatinine normalized</b>                      |                           |                         |                                  |                                |
| Girls                                             | -0.4 (-0.9, 0.2)          | 0.21                    | -0.6 (-1.1, -0.1)                | 0.02                           |
| Boys                                              | 0.0 (-0.5, 0.6)           | 0.88                    | 0.1 (-0.4, 0.5)                  | 0.80                           |
| <b>Not creatinine normalized</b>                  |                           |                         |                                  |                                |
| Girls                                             | -0.1 (-0.5, 0.2)          | 0.44                    | -0.2 (-0.6, 0.1)                 | 0.22                           |
| Boys                                              | 0.1 (-0.4, 0.5)           | 0.71                    | 0.2 (-0.1, 0.6)                  | 0.14                           |

<sup>a</sup>Maternal race (white, black, and other), marital status (married living together, unmarried living together, and unmarried living alone), parity (0, 1, and 2+), age at delivery (continuous in years), household income (continuous in \$10,000 increments), education (< high school, high school, some college, and  $\geq$  bachelor's degree), employment (any and none), insurance (private and public/none), BMI at 16 weeks (continuous in  $\text{kg}/\text{m}^2$ ), depressive symptoms at baseline (continuous), and prenatal serum cotinine (continuous,  $\log_{10}$ -transformed).

Child sex effect measure modification (EMM) p-value for prenatal, creatinine-normalized = 0.30, EMM p-value for prenatal without creatinine-normalization = 0.39, EMM p-value for early childhood creatinine-normalized = 0.05, and EMM p-value for early childhood without creatinine-normalization = 0.06.



**Table S8.** Adjusted cross-sectional associations between child urinary BPA concentrations and BMI z-scores at 2-5 years of age.<sup>a</sup>

| <b>Child age</b> | <b>N</b> | <b>Beta (CI)</b> | <b>p-Value</b> |
|------------------|----------|------------------|----------------|
| 2 Year           | 226      | -0.1 (-0.4, 0.2) | 0.66           |
| 3 Year           | 217      | 0.2 (-0.2, 0.7)  | 0.27           |
| 4 Year           | 167      | 0.1 (-0.3, 0.6)  | 0.63           |
| 5 Year           | 199      | 0.0 (-0.3, 0.4)  | 0.82           |

<sup>a</sup>Maternal race (white, black, and other), marital status (married living together, unmarried living together, and unmarried living alone), parity (0, 1, and 2+), age at delivery (continuous in years), household income (continuous in \$10,000 increments), education (< high school, high school, some college, and  $\geq$  bachelor's degree), employment (any and none), insurance (private and public/none), BMI at 16 weeks (continuous in  $\text{kg}/\text{m}^2$ ), depressive symptoms at baseline (continuous), and prenatal serum cotinine (continuous,  $\log_{10}$ -transformed).

Beta represents change in child BMI z-score with a 10-fold increase in child urinary BPA concentrations.

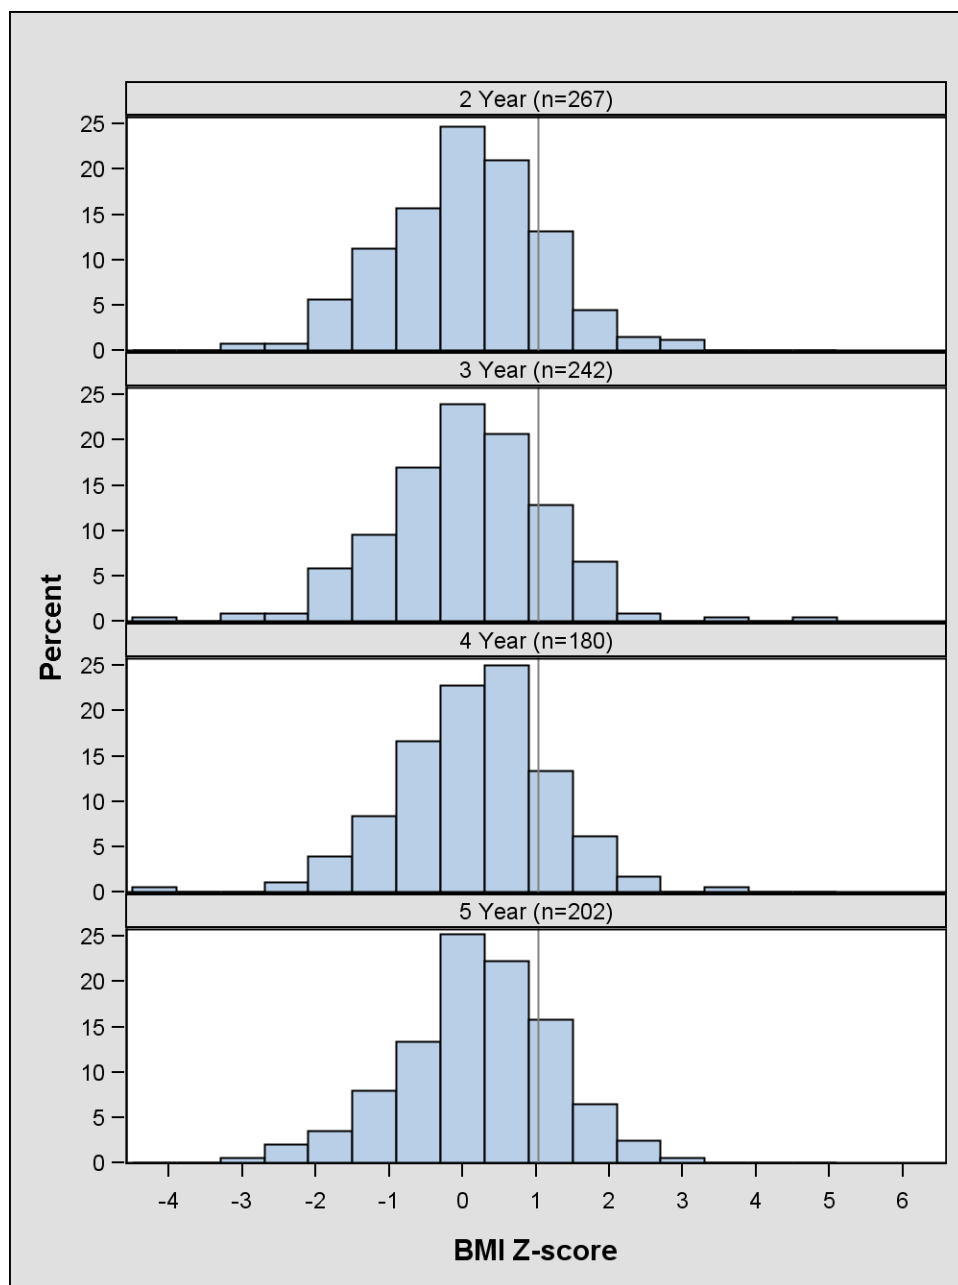

**Figure S1.** Distribution of HOME Study children's BMI z-scores at 2, 3, 4, and 5 years of age.

Grey line represents the 85<sup>th</sup> percentile of BMI z-score, the threshold for being overweight.

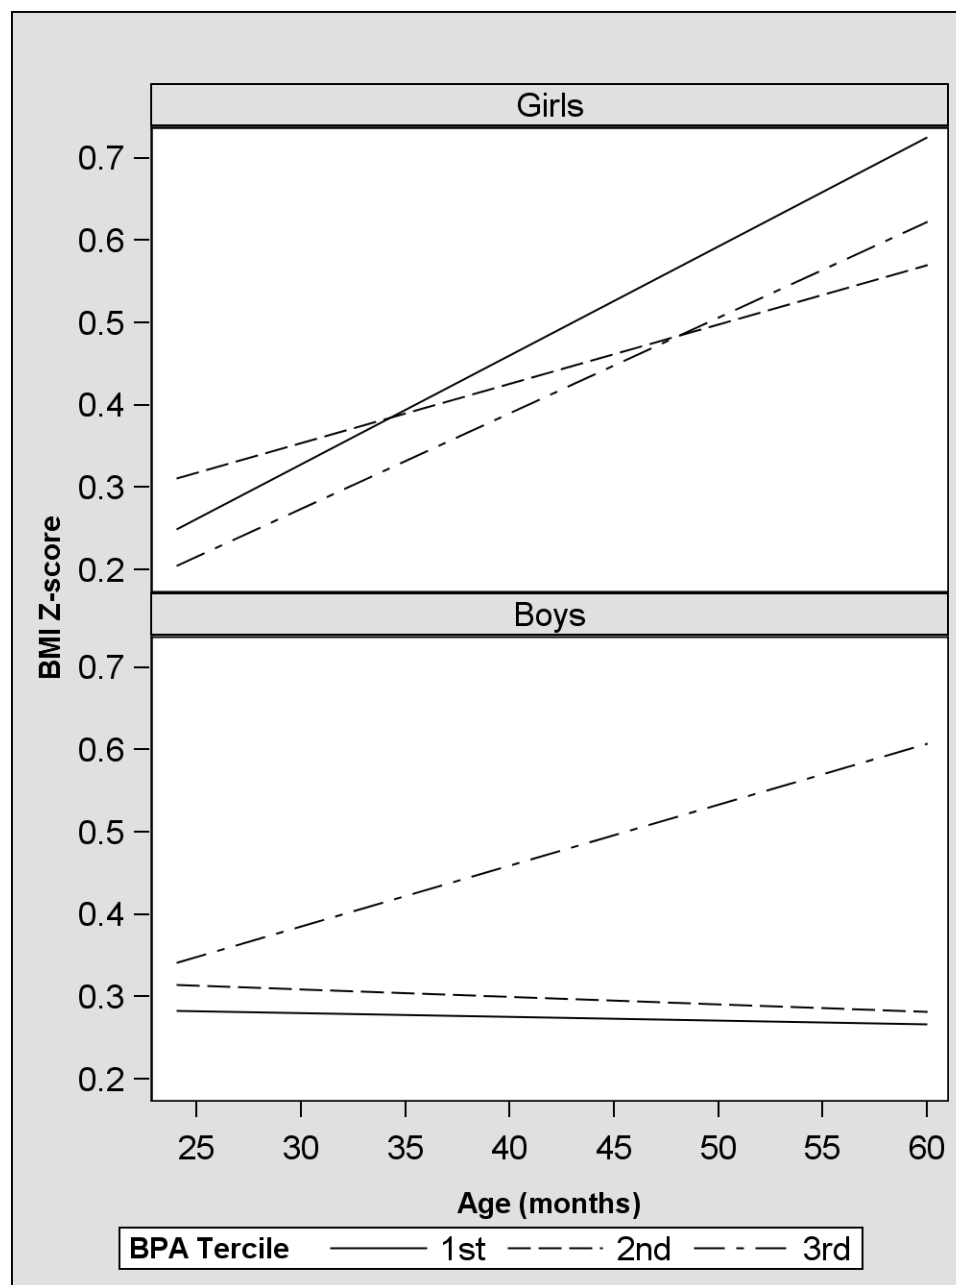

**Figure S2.** Adjusted BMI z-score slopes between 2 and 5 years of age by prenatal urinary BPA concentration and child sex. Adjusted for maternal race (white, black, and other), marital status (married living together, unmarried living together, and unmarried living alone), parity (0, 1, and 2+), age at delivery (continuous in years), household income (continuous in \$10,000 increments), education (< high school, high school, some college, and  $\geq$  bachelor's degree), employment (any and none), insurance (private and public/none), BMI at 16 weeks (continuous in  $\text{kg}/\text{m}^2$ ),

depressive symptoms at baseline (continuous), and prenatal serum cotinine (continuous,  $\log_{10}$ -transformed). The BMI slope was greatest among boys in the 3<sup>rd</sup> BPA tercile (slope = 0.09, 95% CI: -0.01, 0.19) compared to boys in the 1<sup>st</sup> (slope = -0.01, 95% CI: -0.08, 0.07) and 2<sup>nd</sup> tercile (slope = -0.01, 95% CI: -0.08, 0.06) BPA terciles (age x BPA effect measure modification  $p = 0.13$ ). The BMI slopes were not different among girls in the 1<sup>st</sup> (slope = 0.16, 95% CI: 0.06, 0.25), 2<sup>nd</sup> (slope = 0.09, 95% CI: -0.01, 0.18), or 3<sup>rd</sup> (slope = 0.14, 95% CI: 0.07, 0.21) BPA terciles (age x BPA effect measure modification  $p = 0.77$ ).

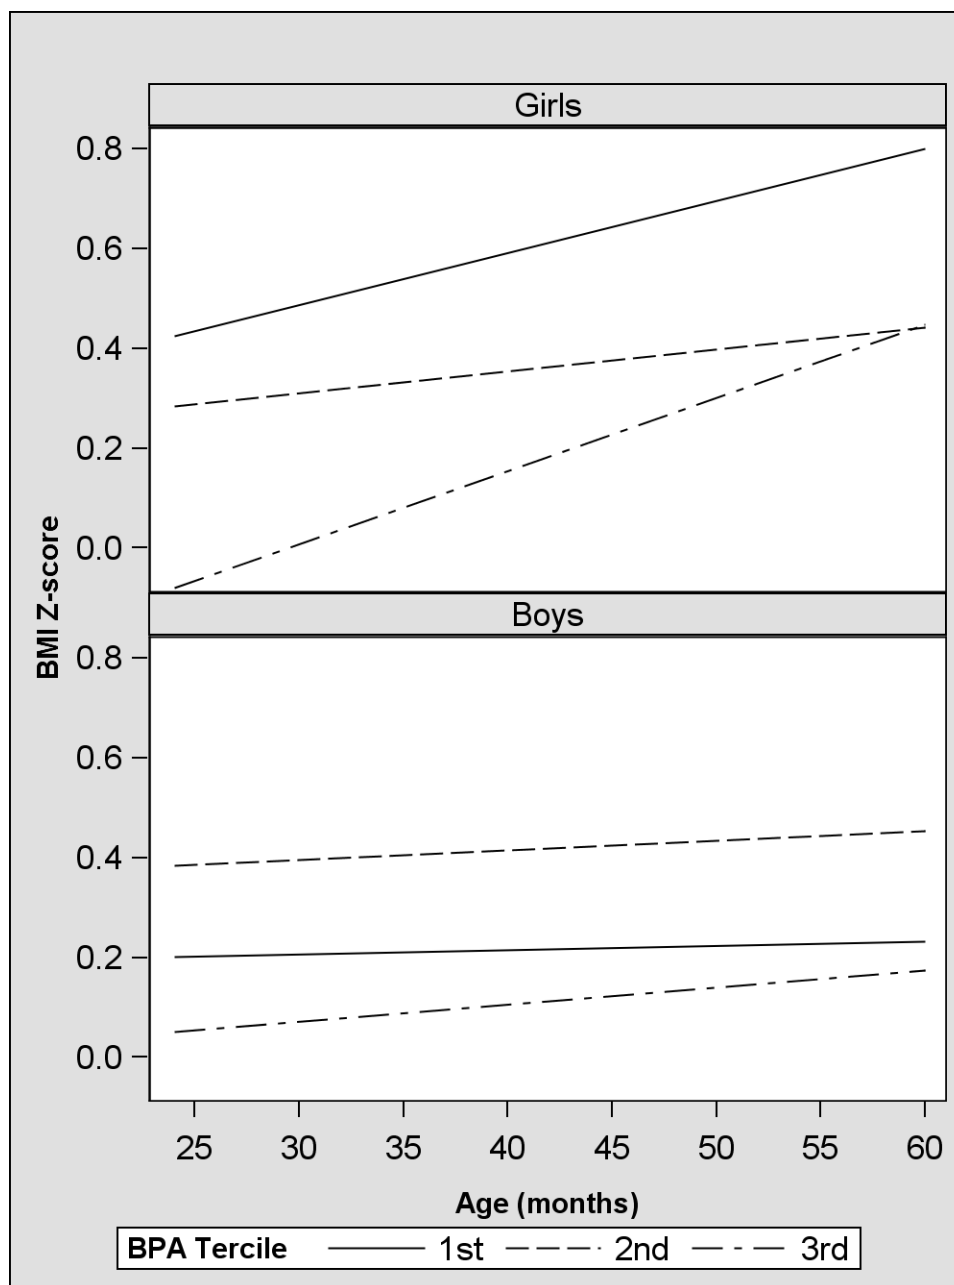

**Figure S3.** Adjusted BMI z-score slopes between 2 and 5 years of age by early childhood urinary BPA concentration and child sex. Adjusted for maternal race (white, black, and other), marital status (married living together, unmarried living together, and unmarried living alone), parity (0, 1, and 2+), age at delivery (continuous in years), household income (continuous in \$10,000 increments), education (< high school, high school, some college, and  $\geq$  bachelor's degree), employment (any and none), insurance (private and public/none), BMI at 16 weeks

(continuous in kg/m<sup>2</sup>), depressive symptoms at baseline (continuous), and prenatal serum cotinine (continuous, log<sub>10</sub>-transformed). The BMI slope was lowest among girls 2<sup>nd</sup> (slope = 0.05, 95% CI: -0.03, 0.14) BPA tercile and highest among girls in the 1<sup>st</sup> (slope = 0.12, 95% CI: 0.05, 0.20) and 3<sup>rd</sup> (slope = 0.18, 95% CI: 0.10, 0.25) BPA terciles (age x BPA effect measure modification p = 0.28). The BMI slopes were not different among boys in the 1<sup>st</sup> (slope = 0.01, 95% CI: -0.09, 0.11), 2<sup>nd</sup> (slope = 0.02, 95% CI: -0.06, 0.10), or 3<sup>rd</sup> (slope = 0.04, 95% CI: -0.02, 0.10) BPA terciles (age x BPA effect measure modification p = 0.62).
